# Supplementary material
Source: PubMed Central journal article supplement (PMC11645620)
Supplement: ajtr0016-6689-f3.pdf [file ajtr0016-6689-f3.pdf]

## Biomarkers in endometrial cancer

**Table S1.** Normality verification

|                              | Benign Uterine Lesions    |                | Endometrial Cancer        |                |
|------------------------------|---------------------------|----------------|---------------------------|----------------|
|                              | Kolmogorov-Smirnov test P | Shapiro-Wilk P | Kolmogorov-Smirnov test P | Shapiro-Wilk P |
| Age (years)                  | 0.705                     | 0.264          | 0.850                     | 0.878          |
| BMI (kg/m <sup>2</sup> )     | 0.851                     | 0.214          | 0.996                     | 0.756          |
| Smoking history (pack-years) | 0.915                     | 0.450          | 0.678                     | 0.243          |
| Alcohol intake (g/week)      | 0.769                     | 0.478          | 0.664                     | 0.452          |
| WBC count                    | 0.986                     | 0.764          | 0.748                     | 0.137          |
| RBC count                    | 0.992                     | 0.736          | 0.971                     | 0.602          |
| Hb                           | 0.872                     | 0.815          | 0.849                     | 0.633          |
| MPV                          | 0.912                     | 0.067          | 0.837                     | 0.369          |
| NLR                          | 0.824                     | 0.566          | 0.835                     | 0.257          |
| LMR                          | 0.991                     | 0.868          | 0.479                     | 0.126          |
| PLR                          | 0.939                     | 0.484          | 0.983                     | 0.650          |
| Neutrophil                   | 0.976                     | 0.822          | 0.956                     | 0.115          |
| Lymphocyte                   | 0.624                     | 0.113          | 0.904                     | 0.773          |
| Monocyte                     | 0.924                     | 0.500          | 0.736                     | 0.061          |
| Platelet                     | 0.582                     | 0.158          | 1.000                     | 0.993          |

Note: WBC: white blood cell count; RBC: red blood cell; Hb: hemoglobin; MPV: mean platelet volume; NLR: neutrophil-lymphocyte ratio; LMR: lymphocyte-monocyte ratio; PLR: platelet-lymphocyte ratio.
